# Supplementary material for: Inducible Wnt16 inactivation: WNT16 regulates cortical bone thickness in adult mice
Source: PubMed Central journal article supplement (PMC5886037; doi:10.1530/joe-18-0020), 2018-03-12
Supplement: joe-237-113-t001.pdf [file joe-237-113-t001.pdf]

**Supplemental Table 1. Body characteristics of untreated *Cre-Wnt16<sup>flox/flox</sup>* and *Wnt16<sup>flox/flox</sup>* male mice**

|                                      | <i>Wnt16<sup>flox/flox</sup></i> | <i>Cre-Wnt16<sup>flox/flox</sup></i> |
|--------------------------------------|----------------------------------|--------------------------------------|
|                                      | n = 7                            | n = 7                                |
| Body weight (g)                      | 31.0 ± 2.2                       | 29.5 ± 1.0                           |
| Femur                                |                                  |                                      |
| Bone length (mm)                     | 16.1 ± 0.1                       | 15.8 ± 0.1                           |
| Trabecular BMD (mg/cm <sup>3</sup> ) | 347 ± 39                         | 339 ± 24                             |
| Cortical thickness (μm)              | 208 ± 7                          | 207 ± 4                              |
| Tibia                                |                                  |                                      |
| Bone length (mm)                     | 18.3 ± 0.1                       | 18.4 ± 0.1                           |
| Trabecular BMD (mg/cm <sup>3</sup> ) | 297 ± 31                         | 296 ± 13                             |
| Cortical thickness (μm)              | 220 ± 7                          | 223 ± 4                              |

Body characteristics of 14-week-old untreated *Cre-Wnt16<sup>flox/flox</sup>* and *Wnt16<sup>flox/flox</sup>* male mice as measured by computed tomography. BMD = bone mineral density. Values are given as mean ± SEM.
