# Supplementary material for: Inducible Wnt16 inactivation: WNT16 regulates cortical bone thickness in adult mice
Source: PubMed Central journal article supplement (PMC5886037; doi:10.1530/joe-18-0020), 2018-03-12
Supplement: joe-237-113-t002.pdf [file joe-237-113-t002.pdf]

**Supplemental Table 2. Cortical bone characteristics of femur of tamoxifen-treated *Cre-Wnt16<sup>flox/flox</sup>* and *Wnt16<sup>flox/flox</sup>* mice**

|                                              | <i>Wnt16<sup>flox/flox</sup></i> | <i>Cre-Wnt16<sup>flox/flox</sup></i> |
|----------------------------------------------|----------------------------------|--------------------------------------|
| Low dose tamoxifen                           | n = 6                            | n = 7                                |
| Total bone area (B.Ar; mm <sup>2</sup> )     | 2.59 ± 0.14                      | 2.21 ± 0.08*                         |
| Marrow cavity area (Ma.Ar; mm <sup>2</sup> ) | 1.50 ± 0.07                      | 1.31 ± 0.06                          |
| Cortical bone area (Ct.Ar; mm <sup>2</sup> ) | 1.09 ± 0.07                      | 0.90 ± 0.02*                         |
| High dose tamoxifen                          | n = 7                            | n = 7                                |
| Total bone area (B.Ar; mm <sup>2</sup> )     | 2.26 ± 0.10                      | 2.24 ± 0.10                          |
| Marrow cavity area (Ma.Ar; mm <sup>2</sup> ) | 1.24 ± 0.08                      | 1.35 ± 0.07                          |
| Cortical bone area (Ct.Ar; mm <sup>2</sup> ) | 1.02 ± 0.04                      | 0.89 ± 0.04*                         |

Computed tomography analyses of diaphyseal femur cortical bone in 14-week-old *Cre-Wnt16<sup>flox/flox</sup>* and *Wnt16<sup>flox/flox</sup>* male mice treated with low dose (0.25 mg/mus/day) or high dose (1 mg/mouse/day) tamoxifen during four consecutive days at 10 weeks of age. Values are given as mean ± SEM. \* $P < 0.05$ , Student's *t* test, *Cre-Wnt16<sup>flox/flox</sup>* vs. *Wnt16<sup>flox/flox</sup>* control mice.
