# Supplementary material for: Inducible Wnt16 inactivation: WNT16 regulates cortical bone thickness in adult mice
Source: PubMed Central journal article supplement (PMC5886037; doi:10.1530/joe-18-0020), 2018-03-12
Supplement: joe-237-113-t003.pdf [file joe-237-113-t003.pdf]

**Supplemental Table 3. Cortical bone characteristics of femur of tamoxifen-treated *Cre-Wnt16<sup>flox/flox</sup>* and *Wnt16<sup>flox/flox</sup>* mice**

|                                              | <i>Wnt16<sup>flox/flox</sup></i><br>n = 11 | <i>Cre-Wnt16<sup>flox/flox</sup></i><br>n = 9 |
|----------------------------------------------|--------------------------------------------|-----------------------------------------------|
| Total bone area (B.Ar; mm <sup>2</sup> )     | 2.23 ± 0.07                                | 2.05 ± 0.09                                   |
| Marrow cavity area (Ma.Ar; mm <sup>2</sup> ) | 1.04 ± 0.05                                | 1.12 ± 0.07                                   |
| Cortical bone area (Ct.Ar; mm <sup>2</sup> ) | 1.19 ± 0.04                                | 0.92 ± 0.04**                                 |

Computed tomography analyses of diaphyseal femur cortical bone in 51-week-old *Cre-Wnt16<sup>flox/flox</sup>* and *Wnt16<sup>flox/flox</sup>* female mice treated with high dose (1 mg/mouse/day) tamoxifen during four consecutive days at the age of 47 weeks. Values are given as mean ± SEM. \*\* $P < 0.01$ , Student's *t* test, *Cre-Wnt16<sup>flox/flox</sup>* vs. *Wnt16<sup>flox/flox</sup>* control mice.
